# Supplementary material
Source: Springer Nature journal article supplement (https://www.springermedizin.de/resource/supplementary/12933_2011_461_MOESM4_ESM.pdf/9538530)

A. Percentage of patients with foot ulcers and of patients who received foot care prior to the amputation.

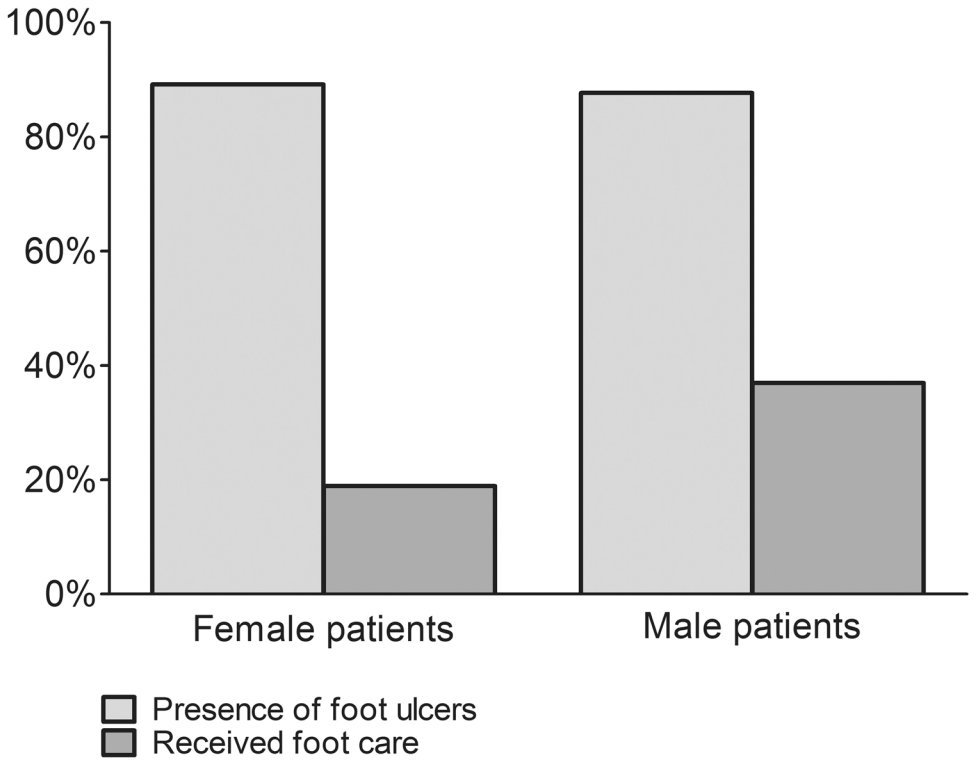

B. Annual distribution of foot ulcers and foot care prior to amputation.

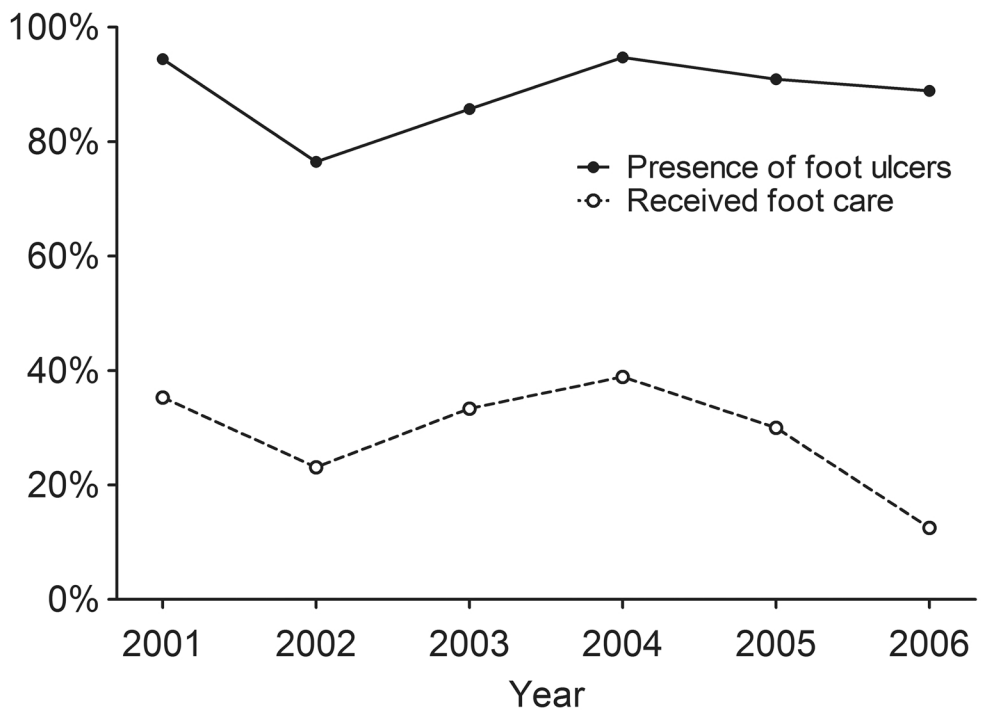

Supplement: MOESM4 [file 9538530]
